# Supplementary material for: A nickel(ii)–manganese(ii)-azido layered coordination polymer showing a three-dimensional ferrimagnetic order at 35 K
Source: Royal Society of Chemistry journal article supplement (doi:10.1039/c7dt04032f), 2017-12-01
Supplement: c7dt04032f1.pdf [file c7dt04032f1.pdf]

## Supporting Information for

### **A nickel(II)-manganese(II)-azido layered coordination polymer showing a three-dimensional ferrimagnetic order at 35 K**

**Sagar Ghosh,<sup>a</sup> Shuvayan Roy,<sup>a</sup> Cai-Ming Liu,<sup>\*b</sup> and Sasankasekhar Mohanta<sup>\*a</sup>**

<sup>a</sup> *Department of Chemistry, University of Calcutta, 92 A. P. C. Road, Kolkata 700 009, India, Fax: 91-33-23519755, E-mail: sm\_cu\_chem@yahoo.co.in.*

<sup>b</sup> *Beijing National Laboratory for Molecular Sciences, Center for Molecular Science, Institute of Chemistry, Chinese Academy of Sciences, Beijing 100190, PR China. E-mail: cmliu@iccas.ac.cn*

**Table S1.** Coercive field and remnant magnetization of **1** at different temperatures

| Temperature (T K) | Coercive field (H <sub>C</sub> Oe) | Remnant Magnetization (M <sub>R</sub> Nβ) |
|-------------------|------------------------------------|-------------------------------------------|
| 1.9               | 65                                 | 1.739                                     |
| 3                 | 34                                 | 1.73                                      |
| 4                 | 28.5                               | 1.262                                     |
| 8                 | 12.4                               | 0.947                                     |
| 10                | 5                                  | 0.82                                      |
| 15                | 5                                  | 0.491                                     |
| 20                | 4.5                                | 0.233                                     |
| 25                | 1.5                                | 0.096                                     |

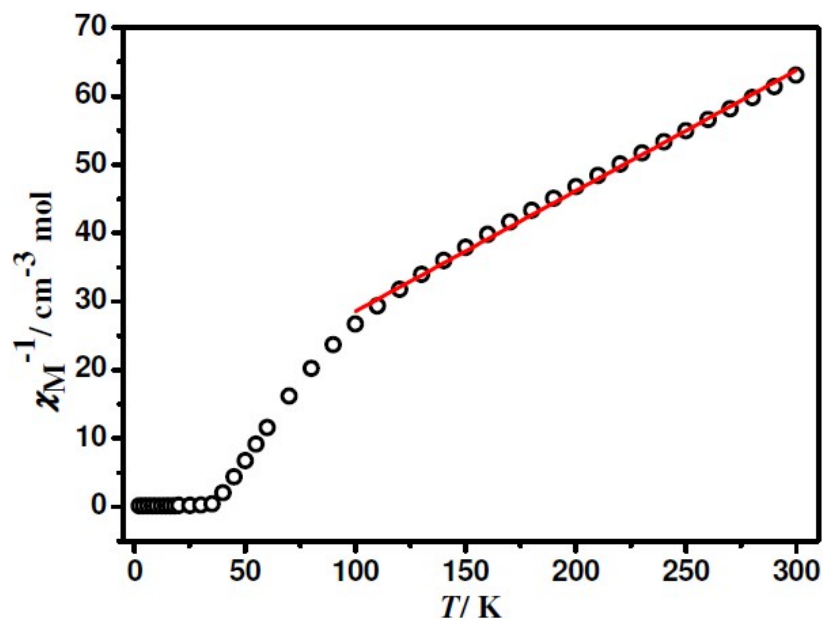

**Fig. S1.** Curie–Weiss fitting of the  $\chi_M^{-1}$  versus  $T$  data of  $[\{(\text{Ni}^{\text{II}}\text{LMn}^{\text{II}})_2(\mu_{1,1,3}\text{-N}_3)_2\}(\mu_{1,3}\text{-N}_3)_2]_n(\mathbf{1})$  in the temperature range 100–300 K. The experimental data is shown as black circles and the red line corresponds to the fitted values.

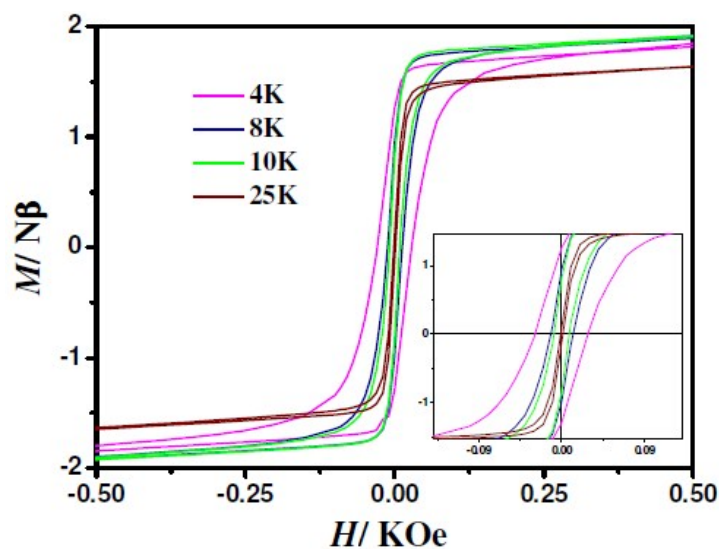

**Fig. S2.** Hysteresis loops for **1** at 4.0, 8.0, 10.0 and 25.0 K. Inset: Parts of the loops with an enlargement of the low-field region.
